# Supplementary material for: Optimality-Based Non-Redfield Plankton-Ecosystem Model (OPEMv1.0) in the UVic-ESCM 2.9. Part I: Implementation and ModelBehaviour
Source: Copernicus journal article supplement (doi:10.5194/gmd-2019-323), 2020-02-13
Supplement: Supplementary file 1 [file gmd-2019-323-supplement.pdf]

# Manual

## UVic-OPEM Set-Up, Calibration, and Reference Simulations

Markus Pahlow      Chia-Te Chien

November 13, 2019

### 1 Setting up UVic-OPEM

#### 1.1 Prerequisites

In order to compile and run UVic-OPEM, first the programs bash, perl, and a Fortran-90 compiler must be installed. Then the netcdf library and its Fortran interface must be compiled with the same Fortran compiler to be used for UVic-OPEM. When installing pre-compiled netcdf libraries, make sure it was compiled with the same Fortran compiler as used in your system.

#### 1.2 Obtaining and compiling the code

1. You can obtain the base UVic code from <http://www.climate.uvic.ca/model/>. Switch to a directory selected for your UVic-OPEM installation, untar the base UVic code there, and change to the directory thus created. In the following, this directory will be referred to as <base>.
2. Change to the updates folder.
3. Download the OPEM v1.0 code from [http://dx.doi.org/10.3289/SW\\_1\\_2020](http://dx.doi.org/10.3289/SW_1_2020) and unpack it inside the updates folder
4. Create another directory, <run> in the following, preferably outside of <base>, change to there, and create two sub-folders, <run>/orig and <run>/OPEM.
5. Copy mk.in\_orig to <run>/orig/mk.in and mk.in\_OPEM to <run>/OPEM/mk.in.
6. Open <run>/orig/mk.in with a text editor and replace <base> on line 5 with the actual path.
7. Change to <run>/orig and issue the command <base>/mk -e to compile the code. This should generate the executable <run>/orig/UVic\_ESCM (specified towards the end of <run>/orig/mk.in as Executable\_File). If the compilation failed, examine the file <run>/orig/mk.log for error messages.
8. Repeat the previous step for <run>/OPEM.

### 2 Reference (trade-off) simulations

For the reference (trade-off) simulations, create three new folders, e.g., <run>/ref\_orig, <run>/ref\_OPEM and <run>/ref\_OPEM-H, and copy the executables and data folders there (they are the same for OPEM and OPEM-H). Copy <base>/updates/opem/restarts/restart\_\*.nc. The place the control.in\_orig, control.in\_OPEM and control.in\_OPEM-H there as well. Assuming you downloaded the control.in\_\* files to <run>:

```
cd <run>
mkdir ref_orig
mkdir ref_OPEM
mkdir ref_OPEM-H
cp -pr <run>/orig/{UVic_ESCM,data} ref_orig/
```

```

cp -pr <run>/OPEM/{UVic_ESCM,data} ref_OPEM/
cp -pr <run>/OPEM/{UVic_ESCM,data} ref_OPEM-H/
cp -pf <base>/updates/opem/restarts/restart_orig.nc <run>/ref_orig/data/restart.nc
cp -pf <base>/updates/opem/restarts/restart_OPEM.nc <run>/ref_OPEM/data/restart.nc
cp -pf <base>/updates/opem/restarts/restart_OPEM-H.nc <run>/ref_OPEM-H/data/restart.nc
cp -p control.in_orig ref_orig/control.in
cp -p control.in_OPEM ref_OPEM/control.in
cp -p control.in_OPEM-H ref_OPEM-H/control.in

```

Then you can obtain the 1-year reference simulation for the original UVic with

```

cd <run>/ref_orig
UVic_ESCM > log

```

and analogously for OPEM and OPEM-H. Note that these simulations assume that the year has 360 days. Thus, the time integrals must be multiplied with 365/360 to obtain annual rates.

## 3 Calibration simulations for OPEM and OPEM-H

### 3.1 Compile UVic\_ESCM

The calibration simulations can be set up with the files in <base>/updates/opem/calibration. For these simulations we used 365-day years, so the UVic\_OPEM must be recompiled with a different mk.in:

```

cd <run>
mkdir calib
cp -p <base>/updates/opem/{mk.in,calibration/*} calib/

```

Now, again, edit calib/mk.in, replacing <base> with its actual path, and compile:

```

cd calib
<base>/mk -e

```

### 3.2 Creating parameter files

Inside the calibration folder (<run>/calib) create two new folders, OPEM and OPEM-H and create the 400 control\_\*.in.in files in each of them:

```

mkdir OPEM
mkdir OPEM-H
cd OPEM
../write_control ../control.in.OPEM
cd ../OPEM-H
../write_control ../control.in.OPEM-H

```

The script write\_control substitutes the 400 parameter combinations in the file parameter.txt in the control.in.\* templates. The control\_\*.in.in files are set up for 100,000-year simulations in steps of 1000 years. In order to do these simulations, set up 400 folders, copy the <run>/calib/UVic\_ESCM and <run>/calib/data there, and distribute the control\_\*.in.in files to <run>/calib/{OPEM,OPEM-H}/\*/control.in.
